# Supplementary material
Source: PubMed Central journal article supplement (PMC4226372)
Supplement: supp_pp.114.244434_244434suppdata.pdf [file supp_pp.114.244434_244434suppdata.pdf]

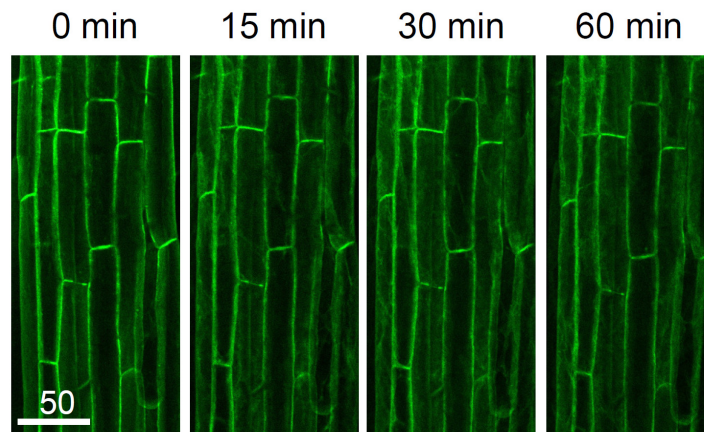

**Supplemental Figure S1.** Effects of blue light (BL) irradiation on the localization of phot1 proteins. Dark-grown *phot1* transgenic plants harboring *35S::PHOT1-GFP* were irradiated with continuous BL at  $0.2 \mu\text{mol m}^{-2} \text{s}^{-1}$ . Green fluorescent protein signals were observed with a microscope at the indicated time after the onset of BL irradiation. White bar, 50  $\mu\text{m}$ .

## Supplemental Methods

### Cloning of 35S::PHOT1-GFP

For construction of 35S::PHOT1-GFP, the coding region of *PHOT1* amplified using PCR was inserted in frame at the *Bam*HI site upstream of GFP in the pTH2 vector (Niwa, 2003). The vector digested with *Hind*III and *Eco*RI was subcloned into the binary vector pPZP211 (Hajdukiewicz et al., 1994). The constructs were transformed into the *phot1-101* mutant (Landsberg *erecta* background) via the floral dipping *Agrobacterium tumefaciens*-mediated transformation method as described previously (Clough and Bent, 1998).

### Supplemental Literature Cited

- Clough SJ, Bent AF** (1998) Floral dip: a simplified method for *Agrobacterium*-mediated transformation of *Arabidopsis thaliana*. *Plant J* **16**: 735–743
- Hajdukiewicz P, Svab Z, Maliga P** (1994) The small, versatile *pPZP* family of *Agrobacterium* binary vectors for plant transformation. *Plant Mol Biol* **25**: 989–994
- Niwa Y** (2003) A synthetic green fluorescent protein gene for plant biotechnology. *Plant Biotech* **20**: 1–11

**Supplemental Table S1.** Gene-specific primers used for genotyping

| Gene                       | Forward Primer          | Reverse Primer            |
|----------------------------|-------------------------|---------------------------|
| <i>pid-14</i> <sup>a</sup> | ATGTTACGAGAATCAGACGGTG  | TCAAAGTAATCGAACGCCGCTGG   |
| <i>wag1</i> <sup>b</sup>   | ATGGAAGACGACGGTTATTACC  | GGAGAAACAACCGCCACCACG     |
| <i>wag2</i> <sup>b</sup>   | CTCCGCAGCAACGGAGAAGCAAC | GAACTCTCTGCCTCAAAGACACAC  |
| <i>pid2</i> <sup>c</sup>   | CGCAGCAGAAACTCTAGTG     | CGTCCATAATAATCACATGGACCTC |

Sequences are 5' to 3'.

<sup>a</sup> JMLB1: GGCAATCAGCTGTTGCCCGTCTCACTGGTG

<sup>b</sup> En-transposon-205: CACGACGGCTGTAGAATAGGA

<sup>c</sup> SAIL-LB1: GCCTTTTCAGAAATGGATAAATAGCCTTGCTTCC

**Supplemental Table S2.** Primers used for cloning of *35S::PHOT1-GFP*, *PIN3::PIN3-VENUS* and *PIN7::PIN7-VENUS*

| Primer   | Sequence                                                                            |
|----------|-------------------------------------------------------------------------------------|
| PIN3B1FW | GGGGACAAGTTTGTACAAAAAAGCAGGCTAGCTGACATATGAAGTGCTTCC                                 |
| PIN7B1FW | GGGGACAAGTTTGTACAAAAAAGCAGGCTCATCTCGTTGGATTGAAGAATGC                                |
| PIN3B4RV | GGGGACAACTTTGTATAGAAAAGTTGGGTGTGAAGCGTTGGATTTTCTCACG                                |
| PIN7B4RV | GGGGACAACTTTGTATAGAAAAGTTGGGTGAGAAGCGTTTGGATTTTCTCACCG                              |
| PIN3B3FW | GGGGACAACTTTGTATAATAAAGTTGGAAGAAGGTCTCACTGCGGC                                      |
| PIN7B3FW | GGGGACAACTTTGTATAATAAAGTTGGACGGAGATCTTTTACGGTGGTGGT                                 |
| PIN3B2RV | GGGGACCACTTTGTACAAGAAAGCTGGGTACAGTAAAGCCACCAATTTGATCAC                              |
| PIN7B2RV | GGGGACCACTTTGTACAAGAAAGCTGGGTATACAAGCGTTTTTGGATCCTC                                 |
| YFPB4rFW | GGGGACAACTTTTCTATACAAAGTTGGAGGTGGAGCTGGAGGTGCAATGGTGAGCAAGGGCGAGGA                  |
| YFPB3rRV | GGGGACAACTTTATTATACAAAGTTGTAGCATAATCTGGAACATCATATGGATATGCCATGGCCTTGTACAGCTCGTCCATGC |
| PHOT1FW  | CAAGGATCCAAGATGGAACCAACAGAAAAACCA                                                   |
| PHOT1RV  | CATGGATCCAACATTTGTTTGCAGATCTTCTAGCT                                                 |

Sequences are 5' to 3'.
